# Supplementary material for: lncRNA UCA1-Mediated Cdc42 Signaling Promotes Oncolytic Vaccinia Virus Cell-to-Cell Spread in Ovarian Cancer
Source: PubMed Central journal article supplement — Mol Ther Oncolytics. 2019 Mar 26;13:35–48. doi: 10.1016/j.omto.2019.03.003 (PMC6463205; doi:10.1016/j.omto.2019.03.003), 2019-03-26
Supplement: mmc1.pdf [file mmc1.pdf]

**OMTO, Volume 13**

## **Supplemental Information**

### **lncRNA UCA1-Mediated Cdc42 Signaling**

#### **Promotes Oncolytic Vaccinia Virus**

#### **Cell-to-Cell Spread in Ovarian Cancer**

**Kosuke Horita, Hajime Kurosaki, Motomu Nakatake, Nozomi Kuwano, Tetsuro Oishi, Hiroaki Itamochi, Sho Sato, Hiromichi Kono, Mai Ito, Kosei Hasegawa, Tasuku Harada, and Takafumi Nakamura**

**A**

| siRNA   | Sequence(5'-3')                                                      | Length (mer) |
|---------|----------------------------------------------------------------------|--------------|
| si-UCA1 | Sense: GAGCCGAUCAGACAAACAAdTdT<br>Antisense: UUGUUUGUCUGAUCGGCUCdTdT | 21           |

**B**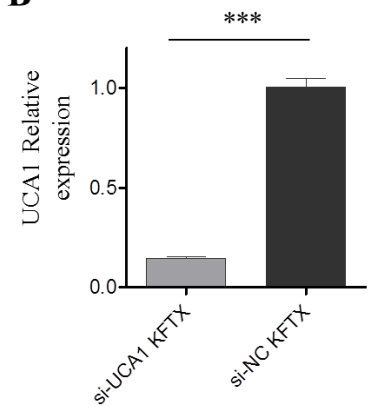**C**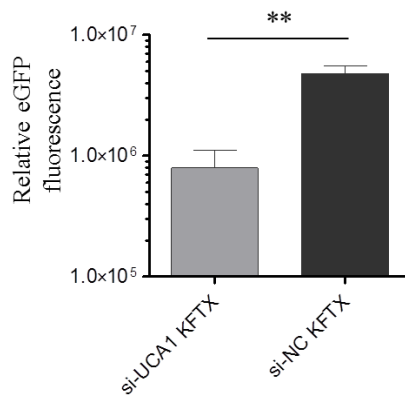**D**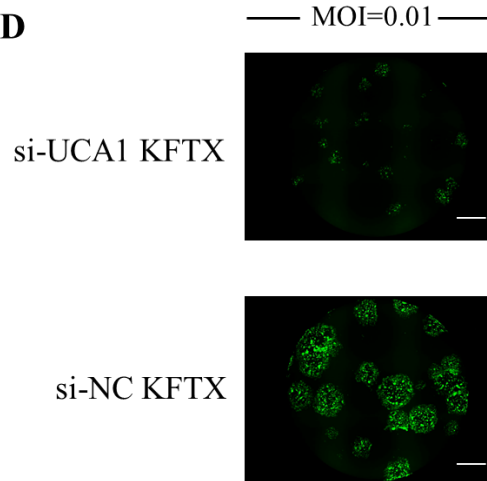

**Fig. S1. UCA1 depletion impairs oncolytic vaccinia virus (OVV)-LG spread.** (A) si-UCA1 and si-NC construction. (B) si-UCA1 or si-NC was transfected into KFTX cells with Lipofectamine™ RNAiMAX Transfection Reagent according to the manufacturer's protocol. After 36 hours, RNA was collected and UCA1 expression was confirmed by qRT-PCR; n = 3 (C) Cells were plated at  $6 \times 10^3$ /well in a 96-well plate and transfected with si-RNA. EGFP images are shown after infection with OVV-LG (MOI = 0.01) for 48 hours. Scale bar: 1000  $\mu$ m. (D) The intensity and area of viral EGFP brightness was measured using a Keyence BZ-X700 fluorescence microscope; n = 3. Data with error bars represent mean  $\pm$  s.e.m. An un-paired t-test was used for (B,C). \*\*p < 0.01, \*\*\*p < 0.001.

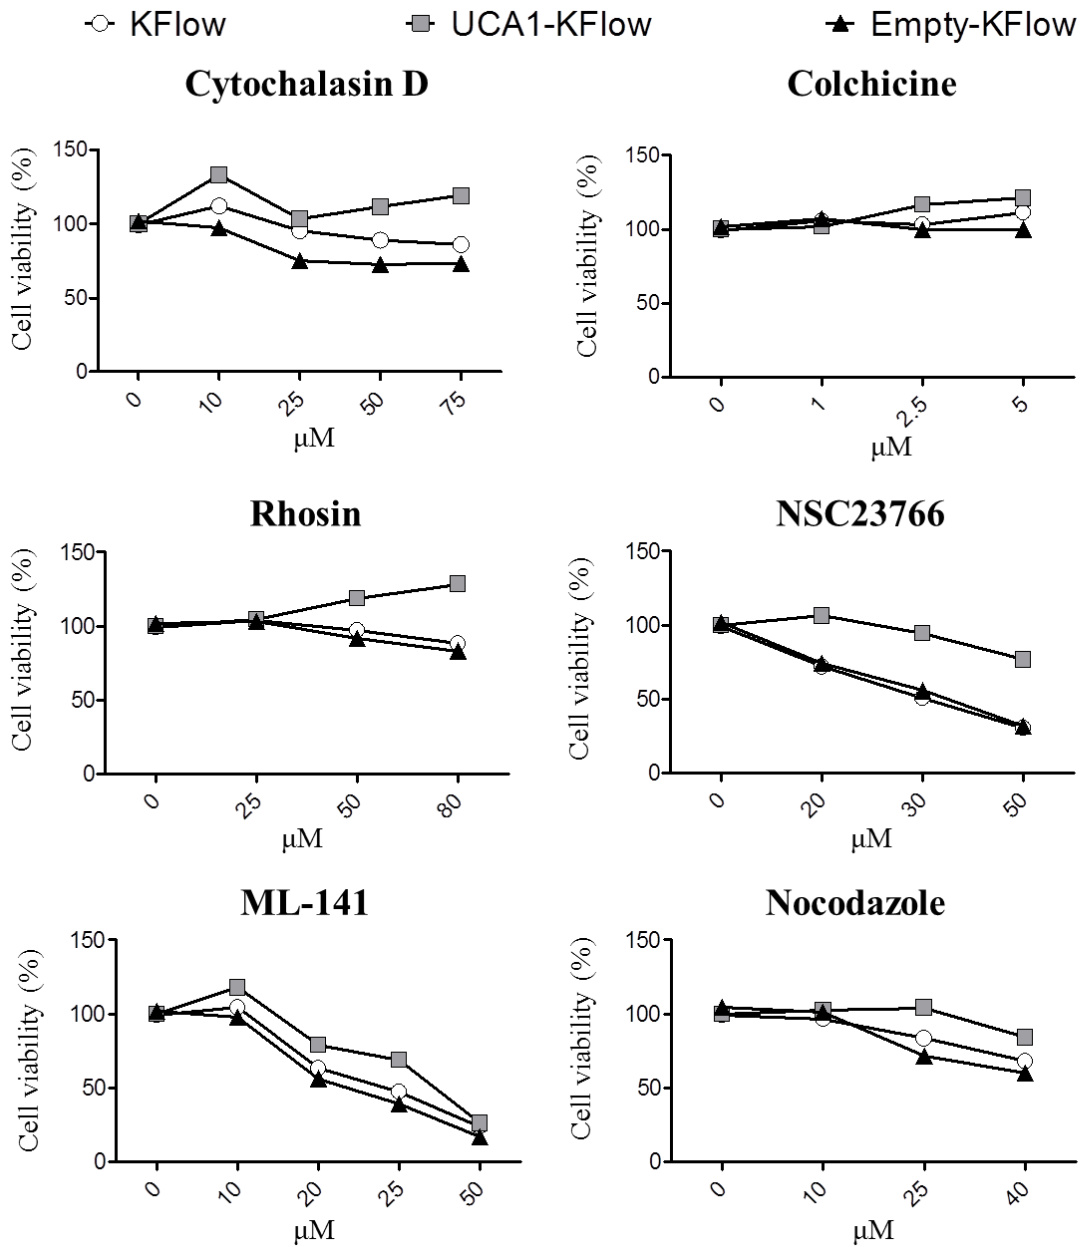

**Fig. S2. Cytotoxicity of the inhibitor against intracellular transport, cell-to-cell spread and the Rho family of small GTPases.** KFlow, UCA1-KFlow, and Empty-KFlow cells were plated at  $6 \times 10^3$ /well in 96-well plates. Cell viability was determined 48 hours after treatment with an inhibitor using the CellTiter-Glo® Luminescent Cell Viability Assay (Promega, Madison, WI).;  $n = 3$ . Data with error bars represent mean  $\pm$  s.e.m.

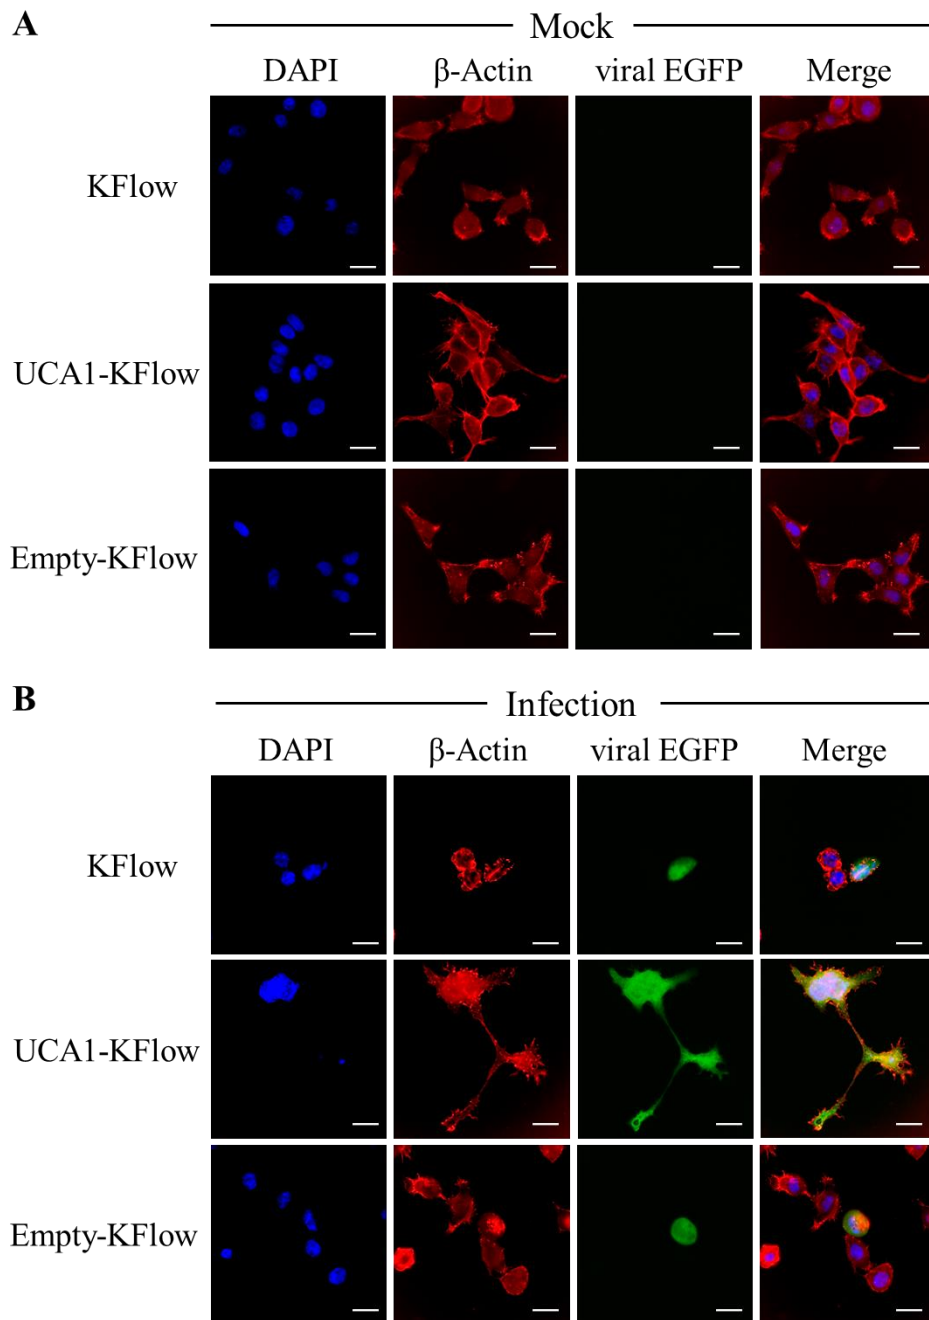

**Fig. S3. UCA1 expression enhances filopodia formation.** Cells were plated at  $1.3 \times 10^4$ /well in 8-well chambers and cultured with 10% FBS. After 24 hours, cells were infected with oncolytic vaccinia virus (OVV)-LG (MOI=1) for 12 hours. **(A)** Mock and **(B)** infected cells were fixed and stained. Images were captured under an immunofluorescence microscope with DAPI in blue,  $\beta$ -actin (13E5, Cell Signaling Technology, MA, USA) in red, viral EGFP in green, and merged pictures. Scale bar: 20  $\mu$ m.

**A**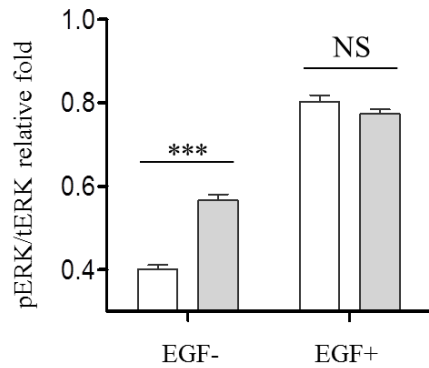**B**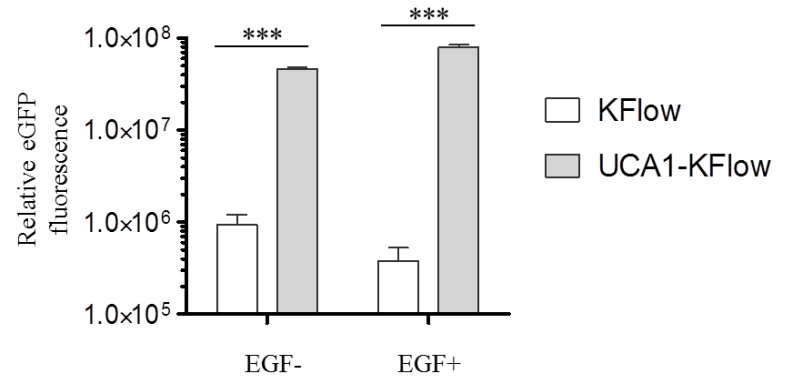**Fig. S4. Activation of ERK with high UCA1 expression had no effect on oncolytic vaccinia virus (OVV)**

**spread.** (A) Cells were plated at  $6 \times 10^3$ /well in 96-well plates and cultured with 10% FBS. After 36 hours, cells were treated with epidermal growth factor (EGF) for 30 minutes and tERK and pERK signals were detected using an In-Cell ELISA Kit according to the manufacturer's protocol (Thermo Fisher Scientific, Rochester, NY);  $n = 3$ . (B) After 30 minutes of EGF stimulation, KFlow and UCA1-KFlow cells were infected with OVV-LG (MOI = 0.01) for 72 hours. Intensity and area of viral EGFP brightness were measured using a Keyence BZ-X700 fluorescence microscope;  $n = 3$ . Data with error bars represent mean  $\pm$  s.e.m. Two-way ANOVA was used for (A,B). \*\*\* $p < 0.001$ .
